# Supplementary material for: A crystal structure of a collaborative RNA regulatory complex reveals mechanisms to refine target specificity
Source: eLife journal article supplement (doi:10.7554/elife.48968), 2019-08-09
Supplement: supp [file elife-48968-supp-v1.zip]

Archive with 16 entries (16 files):
- elife_poa_e48968_Figure_1_figure_supplement_2.pdf
- elife_poa_e48968_Figure_1_source_data_3.xlsx
- elife_poa_e48968_Figure_5_source_data_3.xlsx
- elife_poa_e48968_Figure_2_source_data_2.xlsx
- elife_poa_e48968_Figure_3_source_data_2.xlsx
- elife_poa_e48968_Figure_5_source_data_2.xlsx
- elife_poa_e48968_Figure_5_figure_supplement_1.pdf
- elife_poa_e48968_Transparent_Reporting_File.pdf
- elife_poa_e48968_Figure_2_figure_supplement_1.pdf
- elife_poa_e48968_Figure_3_source_data_1.xlsx
- elife_poa_e48968_Figure_1_figure_supplement_1.pdf
- elife_poa_e48968_Figure_1_source_data_1.xlsx
- elife_poa_e48968_Figure_4_figure_supplement_1.pdf
- elife_poa_e48968_Figure_5_source_data_1.xlsx
- elife_poa_e48968_Figure_2_source_data_1.xlsx
- elife_poa_e48968_Figure_1_source_data_2.xlsx
