# Supplementary material for: A crystal structure of a collaborative RNA regulatory complex reveals mechanisms to refine target specificity
Source: eLife journal article supplement (doi:10.7554/elife.48968), 2019-08-09
Supplement: supp [file elife-48968-supp-v1.zip › elife_poa_e48968_Figure_1_figure_supplement_1.pdf]

## Figure 1 Supplement 1

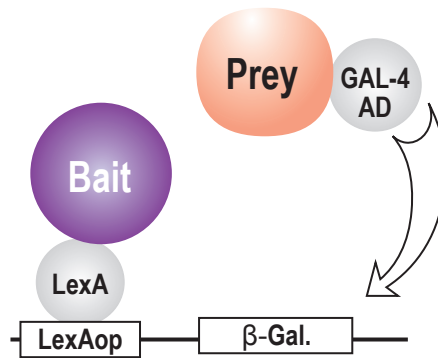

Figure 1 Supplement 1 – A schematic of the yeast two-hybrid assay. To quantify binding activity, fusion proteins are introduced into yeast with a “bait” protein (purple) fused to the LexA DNA-binding domain. The LexA protein provides a tether to the promoter region of the  $\beta$ -gal reporter gene by virtue of its association with the LexA operator site. “Prey” proteins (peach) are introduced as fusions to the GAL4 transcriptional activation domain. Transcription of the reporter gene is dependent on interaction between the bait and prey proteins, which recruits RNA polymerase to the reporter gene.
