# Supplementary material for: A crystal structure of a collaborative RNA regulatory complex reveals mechanisms to refine target specificity
Source: eLife journal article supplement (doi:10.7554/elife.48968), 2019-08-09
Supplement: supp [file elife-48968-supp-v1.zip › elife_poa_e48968_Figure_1_figure_supplement_2.pdf]

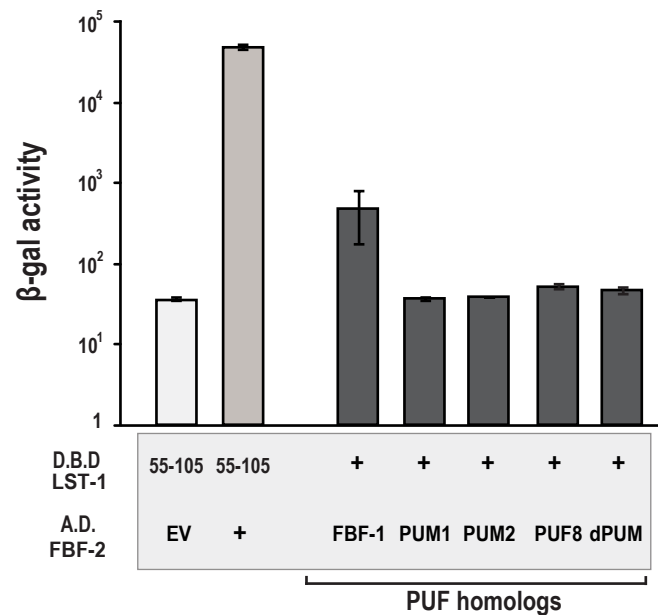

Figure 1 Supplement 2. LST-1 interacts with FBF but not homologous PUF proteins. Yeast-two hybrid assays were conducted with LST-1 residues 55-105 fused to the Lex-A DNA-binding domain (D.B.D.) and the GAL4 activation domain (A.D.) was fused to the PUM domain of the indicated FBF homologs: FBF-1 (residues 121-614), human PUM1 (residues 456-1064), human PUM2 (residues 456-1064), *C. elegans* PUF-8 (full length), and *D. melanogaster* dPUM (residues 1091-1426). Binding activity is shown as units of  $\beta$ -gal activity normalized to cell count. Error bars indicate the standard deviation of three biological replicate measurements.
