# Supplementary material for: A crystal structure of a collaborative RNA regulatory complex reveals mechanisms to refine target specificity
Source: eLife journal article supplement (doi:10.7554/elife.48968), 2019-08-09
Supplement: supp [file elife-48968-supp-v1.zip › elife_poa_e48968_Figure_4_figure_supplement_1.pdf]

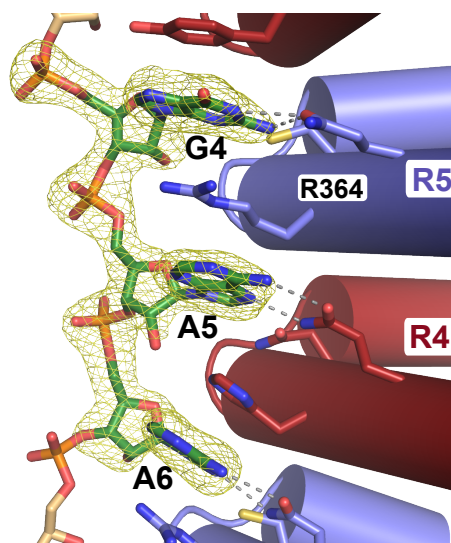

**FBF-2/LST-1/RNA  
1:1 recognition**

Figure 4 Supplement 1.  $F_o - F_c$  simulated annealing omit map for the cFBE RNA nucleotides 4-6, contoured at  $3\sigma$ .
