# Supplementary material for: A crystal structure of a collaborative RNA regulatory complex reveals mechanisms to refine target specificity
Source: eLife journal article supplement (doi:10.7554/elife.48968), 2019-08-09
Supplement: supp [file elife-48968-supp-v1.zip › elife_poa_e48968_Figure_5_figure_supplement_1.pdf]

## Figure 5 Supplement 1

A

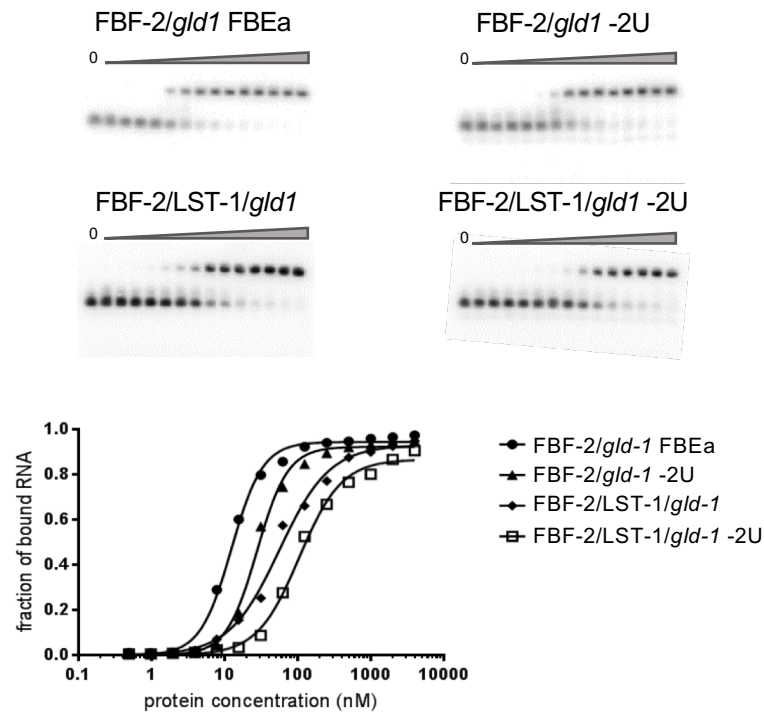

B

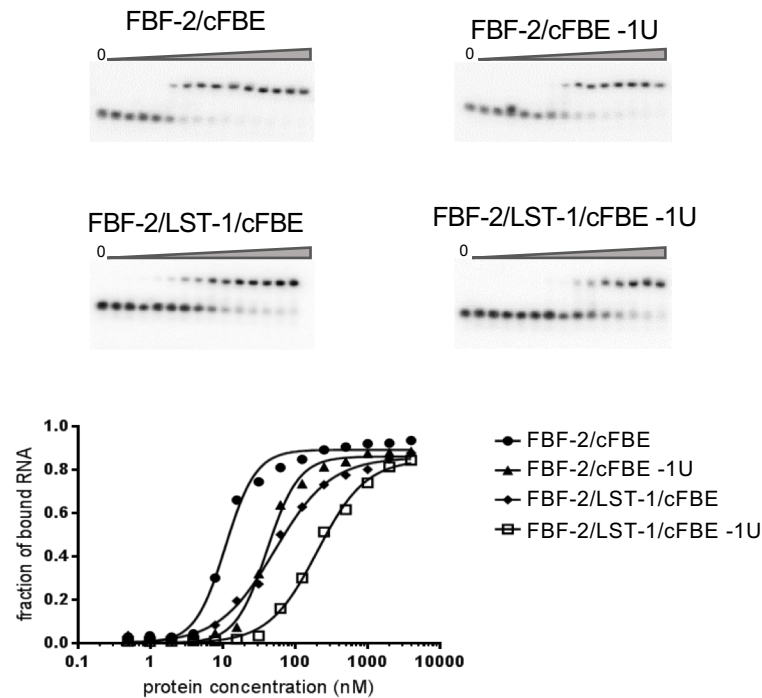

Figure 5 Supplement 1. Representative EMSA gels and corresponding binding curves are shown for binding to *gld-1* (A) and compact FBE (cFBE, B) RNAs. Triangles above the gels indicate increasing concentrations of FBF-2 from 0.49 to 4000 nM. The left lanes in each gel contained no protein.  $K_d$  values for triplicate experiments are presented in Table 2.
