# Supplementary material for: A crystal structure of a collaborative RNA regulatory complex reveals mechanisms to refine target specificity
Source: eLife journal article supplement (doi:10.7554/elife.48968), 2019-08-09
Supplement: supp [file elife-48968-supp-v1.zip › elife_poa_e48968_Figure_5_source_data_1.xlsx]

## Sheet: Sheet1
Figure 5B,C Sequences for MEMEs
FBF-2	LST-1/FBF-2 complex
TTTTGTAAAA	TTTCTGTACC
TTTGTAATAT	TTGTGAATGT
TTTGTAACAT	TTGTACCATG
TTTGTAAAAT	TTCTGTACCA
TTGTAATATT	TGTGAATGTC
TTGTAATATA	TGTGAATGCG
TTGTAACATG	TGTGAATGAC
TTGTAACATA	TGTACCATGT
TTGTAAATAT	TGTACCATGG
TTGTAAAATT	TGTACCATGC
TTGTAAAATG	TGTACCATGA
TTGTAAAATA	TGTAATATGA
TTCTGTAAAT	TGTAACATGA
TTATGTAAAA	TGGGCCCATT
TGTATTATGA	TGCCGAGCCT
TGTACTATAA	TGATCCTATC
TGTAATATTT	TGAGGCCCAT
TGTAATATTG	TGAATGTCGT
TGTAATATTA	TGAATGCGTA
TGTAATATGT	TGAATGATCC
TGTAATATGA	TGAATGACGT
TGTAATATAG	TGAAAGATCC
TGTAATATAA	TGAAACGATC
TGTAACATTT	TCTTCTGTAC
TGTAACATAT	TCTGTGAATG
TGTAACATAA	TCTGTACTAT
TGTAAAATTA	TCTGTACCAT
TGTAAAATGT	TCTGTAATAT
TGTAAAATGG	TCTGTAACAT
TGTAAAATGA	TCCGTTGTGA
TGTAAAATAT	TACTGTGAAT
TGTAAAATAG	TACCATGAAA
TGTAAAATAA	GTTGTGAATG
TGAAAACTGT	GTGCCGAGCC
TCTTGTAACA	GTGAATGTCG
TCTTGTAAAA	GTGAATGCGT
TCTGTAATAT	GTGAATGACG
TCTGTAAATA	GTACCATGTT
TCTGTAAAAT	GTACCATGGA
TATTGTAAAA	GTACCATGAT
TATGTACTAT	GTACCATGAG
TATGTAAAAT	GTACCATGAC
TATAACTGTA	GTACCATGAA
TATAAACTGT	GTAATATGAG
TAGAACTGTA	GTAACATGAG
TACTGTAATA	GGTATCCTTG
TACTGTAAAA	GGGCCCATTC
TAATTTGTAA	GGCGGTATCC
TAATGTATAA	GGCCTTCTGT
TAATCTGTAA	GGCCCATTCG
TAATACTGTA	GCTGTGAATG
TAATAACTGT	GCTGTACCAT
TAACTGTAAC	GCTGTAACAT
TAACTGTAAA	GCGGTATCCT
TAACATAATG	GCCTGTAACA
TAAACTGTGA	GCCTGCTGTA
TAAACTGTAA	GCCGAGCCTG
GTACTATAAA	GATCCTATCT
GTAATATTAA	GAGGCCCATT
GTAATATAAT	GAATGTCGTA
GTAATATAAC	GAATGGTCCT
GTAATATAAA	GAATGCGTAC
GTAACATGAT	GAATGACGTA
GTAACATAAT	CTTGTACCAT
GTAAAATAAT	CTTCTGTACC
GCTGTAATAT	CTGTGAATGT
GCTGTAAAAT	CTGTGAATGC
GATAACTGTA	CTGTGAATGA
GATAAACTGT	CTGTACTATG
GAAACTGTAA	CTGTACCATG
CTTGTAAAAT	CTGTAATATG
CTGTATTATA	CTGTAACATG
CTGTATCATA	CTCTGTGAAT
CTGTACTATA	CTCTGTACCA
CTGTACAATT	CTCTGTAACA
CTGTAATATT	CGTTGTGAAT
CTGTAATATG	CGCTGTGAAT
CTGTAATATA	CGAGCCTGTA
CTGTAACATT	CCTTCTGTAC
CTGTAACATA	CCTGTACCAT
CTGTAAATAA	CCTCTGTGAA
CTGTAAAATT	CCGTTGTGAA
CTGTAAAATG	CCGCTGTGAA
CTGTAAAATA	CCCTTCTGTA
CCTGTAATAT	CCCTCTGTGA
CATGTAAAAT	CCCTCTGTAC
ATTTTGTAAC	CCCGTTGTGA
ATTTGTAACA	CCCGCTGTGA
ATTGTGAATA	CCCACTGTGA
ATTGTAATAT	CCATGAAATA
ATTGTAACAT	CCACTGTGAA
ATTACTGTAA	CACTGTGAAT
ATGTACTATA	ATTCTGTACC
ATGTAATATG	ATTCGTAAGG
ATGTAACATG	ATGTTAGATC
ATGTAAATAT	ATGTTAATGA
ATGTAAAATG	ATGTCGTACC
ATGTAAAATA	ATGTCGTACA
ATGACTGTAA	ATGTATGATC
ATCTGTAATA	ATGTAGATCC
ATCTGTAAAT	ATGTAAGATC
ATCATGTAAA	ATGGGCCCAT
ATATTTGTAA	ATGATGATCC
ATATGTAAAA	ATGATATGAT
ATATACTGTA	ATGAGGCCCA
ATACTGTAAA	ATGACGTACC
ATAATGTAAA	ATGACGATCC
ATAATCTGTA	ATGAATTAAA
ATAACTGTAT	ATGAATGGTC
ATAACTGTAA	ATGAATGATC
ATAAACTGTA	ATGAATATGA
ATAAAATGTA	ATGAATAAAA
ACTTGTAAAA	ATGAAGATCC
ACTGTATCAT	ATGAACGATC
ACTGTACTAT	ATGAAATGAT
ACTGTAATAT	ATGAAATATG
ACTGTAACAT	ATGAAAGATC
ACTGTAAATG	ATGAAACGAT
ACTGTAAATA	ACTGTGAATG
ACTGTAAAAT	ACTGTAATAT
AATTTGTAAC	ACCATGAAAT
AATTGTGAAT	ACATGAGTAC
AATTATGTAA	AATGTTAGAT
AATTACTGTA	AATGTCGTAC
AATGTAATAT	AATGTAGATC
AATGTAACAT	AATGTAATTG
AATGTAAACT	AATGTAAGAT
AATGTAAAAT	AATGTAACGA
AATGAATTGA	AATGGATCCT
AATGAATTAT	AATGGATCCA
AATGAATGAA	AATGCGTACC
AATGAACTGT	AATGATTTTG
AATCTGTAAA	AATGATGATC
AATATCTGTA	AATGATATAA
AATAATGAAT	AATGATAAAT
AATAACTGTA	AATGAGGCCC
AATAAATATG	AATGAGATCC
AATAAACTTG	AATGACGTAC
AATAAACTGT	AATGAATTGA
AACTGTGAAT	AATGAATGAT
AACTGTAATA	AATGAATATG
AACTGTAACA	AATGAATAAT
AACTGTAAAT	AATGAAGATC
AACTGTAAAA	AATGAACGAT
AACATGTAAA	AATGAAATTG
AAATCTGTAA	AATGAAATGA
AAATAACTGT	AATGAAAGAT
AAACTGTGAA	AATGAAACGA
AAACTGTAAT	AATGAAAAGA
AAACTGTAAA	AACATGAGTA

## Sheet: Sheet2
Compact	Extended
trcs-1	gld-1
plk-3	sip-1
tbb-1	cpg-1
daz-1	T19H12.2
mesp-1	trcs-1
R02F2.1	wago-4
cpb-3	hel-1
T13F2.6	ima-3
C01G8.1	tbb-1
T07A9.14	F32D1.7
cpg-2	top-2
gpc-2	D1081.7
panl-2	C09H10.5
egg-1	cpb-3
fkb-6	tofu-1
puf-8	T13F2.6
fzr-1	hil-2
pie-1	sel-8
scc-3	F41E6.18
dna-2	egg-6
F28F8.9	dsb-1
cdc-25.1	idh-1
kca-1	ran-3
zyg-11	htp-2
cash-1	C41G7.3
F25D7.4	cyk-7
hat-1	fkb-6
Y48G1C.12	ent-1
cgp-1	atg-18
tdc-1	pisy-1
C53A5.6	pqn-51
let-92	F33H2.5
cye-1	pri-1
mex-5	scc-3
ain-2	ada-2
ufm-1	pde-2
cki-2	C15C8.7
R07H5.8	aho-3
Y54G2A.19	dna-2
T27F6.7	pif-1
ZK829.7	rpb-7
Y110A2AR.1	cdk-1
Y54G2A.75	cdc-25.1
Y62E10A.14	mei-1
klp-19	Y66D12A.19
him-1	hmg-3
pos-1	zyg-11
dsb-2	blos-4
F11G11.5	cash-1
noca-1	tpxl-1
W06B4.1	T06D8.7
ikke-1	coh-4
htz-1	ebp-2
attf-2	hse-5
M01H9.3	C39E9.12
K03B4.2	K03H1.7
rnp-8	Y53F4B.9
C50D2.7	rev-1
hcp-2	Y10G11A.90
bris-1	F15D4.2
Y67D8A.10	sygl-1
nud-1	nud-2
T28D9.1	Y48G1C.12
math-33	raga-1
rmd-1	frg-1
ZK688.5	Y51F10.3
cku-80	rho-1
T12E12.1	dpy-28
F31C3.4	pus-1
ZK1067.2	rig-4
vps-60	cgp-1
alh-3	him-5
vha-14	Y57A10A.31
wnk-1	R10E4.11
Y39E4B.5	C53A5.6
flcn-1	cye-1
lin-13	K12C11.1
chk-1	ufm-1
C36B1.14	R166.3
Y62E10A.13	T27F6.7
K04F10.3	mig-32
mrck-1	C17E4.4
daf-16	lem-2
cnk-1	Y57G11C.3
K11H3.3	Y17G9B.9
dnj-5	ZK829.7
C41G7.9	Y43E12A.3
Y43F4B.7	tag-296
H19N07.3	Y62E10A.14
Y54G2A.26	wdr-20
atg-7	ppfr-2
hal-2	xrn-1
alx-1	lin-49
Y119D3B.12	T02G5.7
puf-11	him-1
sas-5	sel-8
F10C2.4	acl-2
ZK1067.3	apx-1
dnpp-1	cdt-1
Y41D4A.4	tat-3
W09G3.8	vps-11
toca-2	atf-7
F55A11.7	figl-1
C18D11.3	C14C11.7
Y41C4A.29	panl-2
clh-5	R01B10.4
fbf-1	F11G11.5
nkcc-1	rab-18
swsn-6	F56C9.10
hmg-1.2	C35E7.8
cks-1	F55F8.9
Y82E9BR.14	ikke-1
emb-1	sys-1
C14B1.7	H31G24.3
ced-5	hpo-4
Y17G7B.18	lin-61
F52C12.1	hsp-4
F07C6.4	ced-1
syx-7	flh-1
attf-6	rbr-2
fzy-1	K04F10.7
crh-2	epc-1
brf-1	R04F11.3
plst-1	K03H1.13
mop-25.3	F20H11.1
klp-10	unc-61
aho-3	spd-2
unc-69	Y76A2B.5
tag-335	sas-4
perm-1	F56C9.11
C55A6.1	F26A1.1
Y66D12A.21	cgt-3
pph-4.1	let-711
B0546.4	mut-14
dhfr-1	fog-1
ced-4	F52A8.5
pmp-3	tol-1
R148.4	Y87G2A.7
aptf-3	tag-232
C36A4.5	bris-1
C41D11.3	Y67D8A.10
Y57A10A.28	math-33
ssl-1	lin-3
R11H6.2	aip-1
dli-1	ZK688.5
hrdl-1	pst-1
Y74C10AL.2	asd-1
scc-1	pms-2
F25H5.5	ymel-1
R05D7.5	pqe-1
T07C4.10	xnp-1
C56A3.4	ZK643.2
chaf-1	C46A5.6
jhdm-1	T22H9.1
lit-1	T12E12.1
sid-1	pct-1
T01D3.5	F31C3.4
F13H10.3	cdc-6
hcp-4	teg-1
cdc-7	C01F1.6
efa-6	K02B12.5
psf-3	C09H10.5
C50F4.16	Y14H12B.2
pct-1	set-2
Y55F3AR.1	rad-51
mdt-4	lgg-2
T24H7.3	tag-325
nop-1	tofu-3
C14B9.8	CD4.10
pptr-2	tac-1
ooc-3	egg-5
lab-1	smp-1
Y75B8A.8	eri-9
tbc-17	C02B10.5
ndc-80	hum-1
Y53F4B.18	K06H7.7
C50B6.3	Y53F4B.13
cebp-2	F30F8.10
Y66D12A.8	R151.2
dhs-6	lid-1
knl-2	F40F8.11
Y94H6A.3	T01H3.3
kbp-4	C02F5.13
tag-261	T26A5.8
R02F2.4	daf-16
unc-16	K06A5.1
sinh-1	K11H3.3
C27D9.1	W03G9.2
rbx-2	dnj-5
klp-18	polh-1
set-21	clk-2
R151.6	ksr-2
ufd-2	set-31
Y53F4B.18	knl-3
H05C05.2	C17E4.10
hgrs-1	hda-10
gla-3	atg-7
wdr-48	toe-2
Y43F8C.6	cdk-9
agt-1	F40A3.3
lig-4	T27F6.6
Y116A8C.10	Y119D3B.12
T22C1.3	C44B7.12
cid-1	wapl-1
fbf-2	puf-6
C13B4.1	Y39E4A.3
linc-4	B0491.1
cpg-4	aak-1
cdt-2	cyn-15
C50C3.1	sec-5
F17C11.10	atm-1
vps-34	wdfy-2
E02H1.5	exoc-8
Y17G7B.17	btf-1
	pqn-41
	bed-1
	F55A11.7
	gei-4
	C48B4.8
	tsr-1
	cyp-44A1
	panl-2
	denn-4
	asfl-1
	T23G4.3
	mdt-29
	bli-4
	B0336.7
	Y105E8A.2
	JC8.7
	tbp-1
	F27D4.7
	gck-2
	tofu-4
	orc-3
	cyk-1
	F44E7.4
	F14E5.2
	let-526
	F28B3.5
	crh-2
	set-5
	zer-1
	gna-2
	T22F3.2
	tbc-3
	T28B11.1
	unc-37
	Y45G12B.2
	lmd-1
	F20D12.2
	ocrl-1
	trpp-8
	cblc-1
	Y53C10A.1
	cul-5
	rpb-12
	tpk-1
	M01G5.1
	msh-6
	C25D7.10
	F55A12.10
	C26E6.12
	clec-90
	nhr-86
	Y69A2AR.32
	R148.4
	Y55F3BR.1
	F53F4.14
	K02F3.2
	F43D9.3
	aptf-3
	zgpa-1
	C41D11.3
	F37B12.3
	syx-17
	cil-1
	viln-1
	Y43F11A.6
	ehs-1
	ZK418.9
	atx-3
	ulp-1
	Y38A10A.7
	T25D3.3
	F36H12.2
	egg-4
	nop-1
	cit-1.1
	C16C8.11
	mcm-10
	smg-6
	rbpl-1
	F18A11.6
	madf-11
	F30A10.3
	Y97E10AR.3
	T22C1.3
	vps-24
	ucp-4
	Y92H12BR.2
	ppw-1
	ubxn-4
	2019-04-01
	Y53F4B.18
	C50B6.3
	ragc-1
	mbtr-1
	csn-3
	uso-1
	rab-21
	Y57E12AL.1
	R11D1.1
	C16C10.1
	T23G7.2
	mcu-1
	eak-7
	tre-1
	unc-69
	mys-1
	M01F1.9
	D1054.3
	snpc-3.1
	agt-1
	T07F10.3
	W07A8.2
	R74.8
	ZK632.12
	hst-1
	F16A11.1
	D2096.12
	sys-1
	F43G6.10
	imp-3
	D2096.12
	arx-7
	T08G11.1
	usp-14
	D2030.7
	cec-3
	F29B9.1
	uev-3
	F17C11.10
	larp-5
	Y37D8A.21
	pnc-1
	F23H11.4
	F59A3.12
