# Supplementary material for: A crystal structure of a collaborative RNA regulatory complex reveals mechanisms to refine target specificity
Source: eLife journal article supplement (doi:10.7554/elife.48968), 2019-08-09
Supplement: supp [file elife-48968-supp-v1.zip › elife_poa_e48968_Figure_5_source_data_2.xlsx]

## Sheet: Sheet1
Figure 5E mRNA targets for GO term enrichment
Compact	Extended
trcs-1	gld-1
plk-3	sip-1
tbb-1	cpg-1
daz-1	T19H12.2
mesp-1	trcs-1
R02F2.1	wago-4
cpb-3	hel-1
T13F2.6	ima-3
C01G8.1	tbb-1
T07A9.14	F32D1.7
cpg-2	top-2
gpc-2	D1081.7
panl-2	C09H10.5
egg-1	cpb-3
fkb-6	tofu-1
puf-8	T13F2.6
fzr-1	hil-2
pie-1	sel-8
scc-3	F41E6.18
dna-2	egg-6
F28F8.9	dsb-1
cdc-25.1	idh-1
kca-1	ran-3
zyg-11	htp-2
cash-1	C41G7.3
F25D7.4	cyk-7
hat-1	fkb-6
Y48G1C.12	ent-1
cgp-1	atg-18
tdc-1	pisy-1
C53A5.6	pqn-51
let-92	F33H2.5
cye-1	pri-1
mex-5	scc-3
ain-2	ada-2
ufm-1	pde-2
cki-2	C15C8.7
R07H5.8	aho-3
Y54G2A.19	dna-2
T27F6.7	pif-1
ZK829.7	rpb-7
Y110A2AR.1	cdk-1
Y54G2A.75	cdc-25.1
Y62E10A.14	mei-1
klp-19	Y66D12A.19
him-1	hmg-3
pos-1	zyg-11
dsb-2	blos-4
F11G11.5	cash-1
noca-1	tpxl-1
W06B4.1	T06D8.7
ikke-1	coh-4
htz-1	ebp-2
attf-2	hse-5
M01H9.3	C39E9.12
K03B4.2	K03H1.7
rnp-8	Y53F4B.9
C50D2.7	rev-1
hcp-2	Y10G11A.90
bris-1	F15D4.2
Y67D8A.10	sygl-1
nud-1	nud-2
T28D9.1	Y48G1C.12
math-33	raga-1
rmd-1	frg-1
ZK688.5	Y51F10.3
cku-80	rho-1
T12E12.1	dpy-28
F31C3.4	pus-1
ZK1067.2	rig-4
vps-60	cgp-1
alh-3	him-5
vha-14	Y57A10A.31
wnk-1	R10E4.11
Y39E4B.5	C53A5.6
flcn-1	cye-1
lin-13	K12C11.1
chk-1	ufm-1
C36B1.14	R166.3
Y62E10A.13	T27F6.7
K04F10.3	mig-32
mrck-1	C17E4.4
daf-16	lem-2
cnk-1	Y57G11C.3
K11H3.3	Y17G9B.9
dnj-5	ZK829.7
C41G7.9	Y43E12A.3
Y43F4B.7	tag-296
H19N07.3	Y62E10A.14
Y54G2A.26	wdr-20
atg-7	ppfr-2
hal-2	xrn-1
alx-1	lin-49
Y119D3B.12	T02G5.7
puf-11	him-1
sas-5	sel-8
F10C2.4	acl-2
ZK1067.3	apx-1
dnpp-1	cdt-1
Y41D4A.4	tat-3
W09G3.8	vps-11
toca-2	atf-7
F55A11.7	figl-1
C18D11.3	C14C11.7
Y41C4A.29	panl-2
clh-5	R01B10.4
fbf-1	F11G11.5
nkcc-1	rab-18
swsn-6	F56C9.10
hmg-1.2	C35E7.8
cks-1	F55F8.9
Y82E9BR.14	ikke-1
emb-1	sys-1
C14B1.7	H31G24.3
ced-5	hpo-4
Y17G7B.18	lin-61
F52C12.1	hsp-4
F07C6.4	ced-1
syx-7	flh-1
attf-6	rbr-2
fzy-1	K04F10.7
crh-2	epc-1
brf-1	R04F11.3
plst-1	K03H1.13
mop-25.3	F20H11.1
klp-10	unc-61
aho-3	spd-2
unc-69	Y76A2B.5
tag-335	sas-4
perm-1	F56C9.11
C55A6.1	F26A1.1
Y66D12A.21	cgt-3
pph-4.1	let-711
B0546.4	mut-14
dhfr-1	fog-1
ced-4	F52A8.5
pmp-3	tol-1
R148.4	Y87G2A.7
aptf-3	tag-232
C36A4.5	bris-1
C41D11.3	Y67D8A.10
Y57A10A.28	math-33
ssl-1	lin-3
R11H6.2	aip-1
dli-1	ZK688.5
hrdl-1	pst-1
Y74C10AL.2	asd-1
scc-1	pms-2
F25H5.5	ymel-1
R05D7.5	pqe-1
T07C4.10	xnp-1
C56A3.4	ZK643.2
chaf-1	C46A5.6
jhdm-1	T22H9.1
lit-1	T12E12.1
sid-1	pct-1
T01D3.5	F31C3.4
F13H10.3	cdc-6
hcp-4	teg-1
cdc-7	C01F1.6
efa-6	K02B12.5
psf-3	C09H10.5
C50F4.16	Y14H12B.2
pct-1	set-2
Y55F3AR.1	rad-51
mdt-4	lgg-2
T24H7.3	tag-325
nop-1	tofu-3
C14B9.8	CD4.10
pptr-2	tac-1
ooc-3	egg-5
lab-1	smp-1
Y75B8A.8	eri-9
tbc-17	C02B10.5
ndc-80	hum-1
Y53F4B.18	K06H7.7
C50B6.3	Y53F4B.13
cebp-2	F30F8.10
Y66D12A.8	R151.2
dhs-6	lid-1
knl-2	F40F8.11
Y94H6A.3	T01H3.3
kbp-4	C02F5.13
tag-261	T26A5.8
R02F2.4	daf-16
unc-16	K06A5.1
sinh-1	K11H3.3
C27D9.1	W03G9.2
rbx-2	dnj-5
klp-18	polh-1
set-21	clk-2
R151.6	ksr-2
ufd-2	set-31
Y53F4B.18	knl-3
H05C05.2	C17E4.10
hgrs-1	hda-10
gla-3	atg-7
wdr-48	toe-2
Y43F8C.6	cdk-9
agt-1	F40A3.3
lig-4	T27F6.6
Y116A8C.10	Y119D3B.12
T22C1.3	C44B7.12
cid-1	wapl-1
fbf-2	puf-6
C13B4.1	Y39E4A.3
linc-4	B0491.1
cpg-4	aak-1
cdt-2	cyn-15
C50C3.1	sec-5
F17C11.10	atm-1
vps-34	wdfy-2
E02H1.5	exoc-8
Y17G7B.17	btf-1
	pqn-41
	bed-1
	F55A11.7
	gei-4
	C48B4.8
	tsr-1
	cyp-44A1
	panl-2
	denn-4
	asfl-1
	T23G4.3
	mdt-29
	bli-4
	B0336.7
	Y105E8A.2
	JC8.7
	tbp-1
	F27D4.7
	gck-2
	tofu-4
	orc-3
	cyk-1
	F44E7.4
	F14E5.2
	let-526
	F28B3.5
	crh-2
	set-5
	zer-1
	gna-2
	T22F3.2
	tbc-3
	T28B11.1
	unc-37
	Y45G12B.2
	lmd-1
	F20D12.2
	ocrl-1
	trpp-8
	cblc-1
	Y53C10A.1
	cul-5
	rpb-12
	tpk-1
	M01G5.1
	msh-6
	C25D7.10
	F55A12.10
	C26E6.12
	clec-90
	nhr-86
	Y69A2AR.32
	R148.4
	Y55F3BR.1
	F53F4.14
	K02F3.2
	F43D9.3
	aptf-3
	zgpa-1
	C41D11.3
	F37B12.3
	syx-17
	cil-1
	viln-1
	Y43F11A.6
	ehs-1
	ZK418.9
	atx-3
	ulp-1
	Y38A10A.7
	T25D3.3
	F36H12.2
	egg-4
	nop-1
	cit-1.1
	C16C8.11
	mcm-10
	smg-6
	rbpl-1
	F18A11.6
	madf-11
	F30A10.3
	Y97E10AR.3
	T22C1.3
	vps-24
	ucp-4
	Y92H12BR.2
	ppw-1
	ubxn-4
	43556
	Y53F4B.18
	C50B6.3
	ragc-1
	mbtr-1
	csn-3
	uso-1
	rab-21
	Y57E12AL.1
	R11D1.1
	C16C10.1
	T23G7.2
	mcu-1
	eak-7
	tre-1
	unc-69
	mys-1
	M01F1.9
	D1054.3
	snpc-3.1
	agt-1
	T07F10.3
	W07A8.2
	R74.8
	ZK632.12
	hst-1
	F16A11.1
	D2096.12
	sys-1
	F43G6.10
	imp-3
	D2096.12
	arx-7
	T08G11.1
	usp-14
	D2030.7
	cec-3
	F29B9.1
	uev-3
	F17C11.10
	larp-5
	Y37D8A.21
	pnc-1
	F23H11.4
	F59A3.12

## Sheet: Sheet2
Compact	Extended
trcs-1	gld-1
plk-3	sip-1
tbb-1	cpg-1
daz-1	T19H12.2
mesp-1	trcs-1
R02F2.1	wago-4
cpb-3	hel-1
T13F2.6	ima-3
C01G8.1	tbb-1
T07A9.14	F32D1.7
cpg-2	top-2
gpc-2	D1081.7
panl-2	C09H10.5
egg-1	cpb-3
fkb-6	tofu-1
puf-8	T13F2.6
fzr-1	hil-2
pie-1	sel-8
scc-3	F41E6.18
dna-2	egg-6
F28F8.9	dsb-1
cdc-25.1	idh-1
kca-1	ran-3
zyg-11	htp-2
cash-1	C41G7.3
F25D7.4	cyk-7
hat-1	fkb-6
Y48G1C.12	ent-1
cgp-1	atg-18
tdc-1	pisy-1
C53A5.6	pqn-51
let-92	F33H2.5
cye-1	pri-1
mex-5	scc-3
ain-2	ada-2
ufm-1	pde-2
cki-2	C15C8.7
R07H5.8	aho-3
Y54G2A.19	dna-2
T27F6.7	pif-1
ZK829.7	rpb-7
Y110A2AR.1	cdk-1
Y54G2A.75	cdc-25.1
Y62E10A.14	mei-1
klp-19	Y66D12A.19
him-1	hmg-3
pos-1	zyg-11
dsb-2	blos-4
F11G11.5	cash-1
noca-1	tpxl-1
W06B4.1	T06D8.7
ikke-1	coh-4
htz-1	ebp-2
attf-2	hse-5
M01H9.3	C39E9.12
K03B4.2	K03H1.7
rnp-8	Y53F4B.9
C50D2.7	rev-1
hcp-2	Y10G11A.90
bris-1	F15D4.2
Y67D8A.10	sygl-1
nud-1	nud-2
T28D9.1	Y48G1C.12
math-33	raga-1
rmd-1	frg-1
ZK688.5	Y51F10.3
cku-80	rho-1
T12E12.1	dpy-28
F31C3.4	pus-1
ZK1067.2	rig-4
vps-60	cgp-1
alh-3	him-5
vha-14	Y57A10A.31
wnk-1	R10E4.11
Y39E4B.5	C53A5.6
flcn-1	cye-1
lin-13	K12C11.1
chk-1	ufm-1
C36B1.14	R166.3
Y62E10A.13	T27F6.7
K04F10.3	mig-32
mrck-1	C17E4.4
daf-16	lem-2
cnk-1	Y57G11C.3
K11H3.3	Y17G9B.9
dnj-5	ZK829.7
C41G7.9	Y43E12A.3
Y43F4B.7	tag-296
H19N07.3	Y62E10A.14
Y54G2A.26	wdr-20
atg-7	ppfr-2
hal-2	xrn-1
alx-1	lin-49
Y119D3B.12	T02G5.7
puf-11	him-1
sas-5	sel-8
F10C2.4	acl-2
ZK1067.3	apx-1
dnpp-1	cdt-1
Y41D4A.4	tat-3
W09G3.8	vps-11
toca-2	atf-7
F55A11.7	figl-1
C18D11.3	C14C11.7
Y41C4A.29	panl-2
clh-5	R01B10.4
fbf-1	F11G11.5
nkcc-1	rab-18
swsn-6	F56C9.10
hmg-1.2	C35E7.8
cks-1	F55F8.9
Y82E9BR.14	ikke-1
emb-1	sys-1
C14B1.7	H31G24.3
ced-5	hpo-4
Y17G7B.18	lin-61
F52C12.1	hsp-4
F07C6.4	ced-1
syx-7	flh-1
attf-6	rbr-2
fzy-1	K04F10.7
crh-2	epc-1
brf-1	R04F11.3
plst-1	K03H1.13
mop-25.3	F20H11.1
klp-10	unc-61
aho-3	spd-2
unc-69	Y76A2B.5
tag-335	sas-4
perm-1	F56C9.11
C55A6.1	F26A1.1
Y66D12A.21	cgt-3
pph-4.1	let-711
B0546.4	mut-14
dhfr-1	fog-1
ced-4	F52A8.5
pmp-3	tol-1
R148.4	Y87G2A.7
aptf-3	tag-232
C36A4.5	bris-1
C41D11.3	Y67D8A.10
Y57A10A.28	math-33
ssl-1	lin-3
R11H6.2	aip-1
dli-1	ZK688.5
hrdl-1	pst-1
Y74C10AL.2	asd-1
scc-1	pms-2
F25H5.5	ymel-1
R05D7.5	pqe-1
T07C4.10	xnp-1
C56A3.4	ZK643.2
chaf-1	C46A5.6
jhdm-1	T22H9.1
lit-1	T12E12.1
sid-1	pct-1
T01D3.5	F31C3.4
F13H10.3	cdc-6
hcp-4	teg-1
cdc-7	C01F1.6
efa-6	K02B12.5
psf-3	C09H10.5
C50F4.16	Y14H12B.2
pct-1	set-2
Y55F3AR.1	rad-51
mdt-4	lgg-2
T24H7.3	tag-325
nop-1	tofu-3
C14B9.8	CD4.10
pptr-2	tac-1
ooc-3	egg-5
lab-1	smp-1
Y75B8A.8	eri-9
tbc-17	C02B10.5
ndc-80	hum-1
Y53F4B.18	K06H7.7
C50B6.3	Y53F4B.13
cebp-2	F30F8.10
Y66D12A.8	R151.2
dhs-6	lid-1
knl-2	F40F8.11
Y94H6A.3	T01H3.3
kbp-4	C02F5.13
tag-261	T26A5.8
R02F2.4	daf-16
unc-16	K06A5.1
sinh-1	K11H3.3
C27D9.1	W03G9.2
rbx-2	dnj-5
klp-18	polh-1
set-21	clk-2
R151.6	ksr-2
ufd-2	set-31
Y53F4B.18	knl-3
H05C05.2	C17E4.10
hgrs-1	hda-10
gla-3	atg-7
wdr-48	toe-2
Y43F8C.6	cdk-9
agt-1	F40A3.3
lig-4	T27F6.6
Y116A8C.10	Y119D3B.12
T22C1.3	C44B7.12
cid-1	wapl-1
fbf-2	puf-6
C13B4.1	Y39E4A.3
linc-4	B0491.1
cpg-4	aak-1
cdt-2	cyn-15
C50C3.1	sec-5
F17C11.10	atm-1
vps-34	wdfy-2
E02H1.5	exoc-8
Y17G7B.17	btf-1
	pqn-41
	bed-1
	F55A11.7
	gei-4
	C48B4.8
	tsr-1
	cyp-44A1
	panl-2
	denn-4
	asfl-1
	T23G4.3
	mdt-29
	bli-4
	B0336.7
	Y105E8A.2
	JC8.7
	tbp-1
	F27D4.7
	gck-2
	tofu-4
	orc-3
	cyk-1
	F44E7.4
	F14E5.2
	let-526
	F28B3.5
	crh-2
	set-5
	zer-1
	gna-2
	T22F3.2
	tbc-3
	T28B11.1
	unc-37
	Y45G12B.2
	lmd-1
	F20D12.2
	ocrl-1
	trpp-8
	cblc-1
	Y53C10A.1
	cul-5
	rpb-12
	tpk-1
	M01G5.1
	msh-6
	C25D7.10
	F55A12.10
	C26E6.12
	clec-90
	nhr-86
	Y69A2AR.32
	R148.4
	Y55F3BR.1
	F53F4.14
	K02F3.2
	F43D9.3
	aptf-3
	zgpa-1
	C41D11.3
	F37B12.3
	syx-17
	cil-1
	viln-1
	Y43F11A.6
	ehs-1
	ZK418.9
	atx-3
	ulp-1
	Y38A10A.7
	T25D3.3
	F36H12.2
	egg-4
	nop-1
	cit-1.1
	C16C8.11
	mcm-10
	smg-6
	rbpl-1
	F18A11.6
	madf-11
	F30A10.3
	Y97E10AR.3
	T22C1.3
	vps-24
	ucp-4
	Y92H12BR.2
	ppw-1
	ubxn-4
	2019-04-01
	Y53F4B.18
	C50B6.3
	ragc-1
	mbtr-1
	csn-3
	uso-1
	rab-21
	Y57E12AL.1
	R11D1.1
	C16C10.1
	T23G7.2
	mcu-1
	eak-7
	tre-1
	unc-69
	mys-1
	M01F1.9
	D1054.3
	snpc-3.1
	agt-1
	T07F10.3
	W07A8.2
	R74.8
	ZK632.12
	hst-1
	F16A11.1
	D2096.12
	sys-1
	F43G6.10
	imp-3
	D2096.12
	arx-7
	T08G11.1
	usp-14
	D2030.7
	cec-3
	F29B9.1
	uev-3
	F17C11.10
	larp-5
	Y37D8A.21
	pnc-1
	F23H11.4
	F59A3.12
