# Supplementary figures and images for: A crystal structure of a collaborative RNA regulatory complex reveals mechanisms to refine target specificity
Source: eLife journal article supplement (doi:10.7554/elife.48968), 2019-08-09

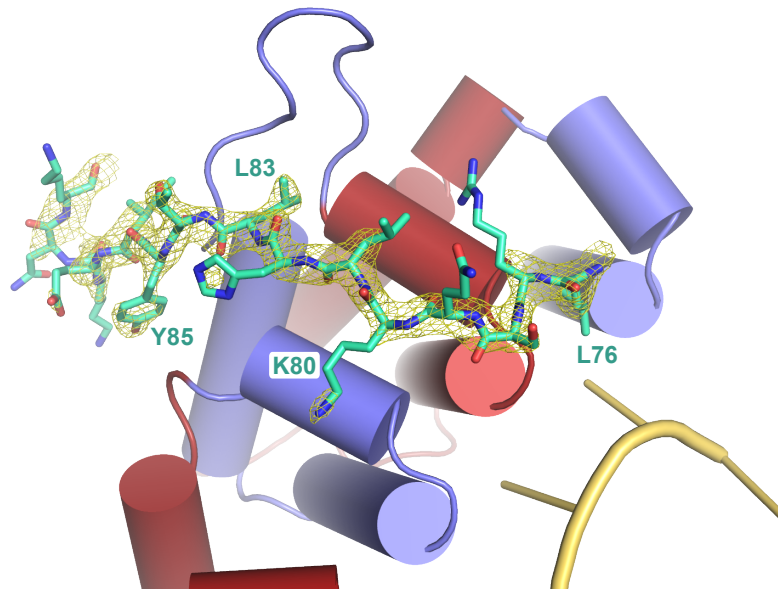

Figure 2 Supplement 1.  $F_o - F_c$  simulated annealing omit map for the LST-1 peptide, contoured at  $3\sigma$ .

Supplement: supp [file elife-48968-supp-v1.zip › elife_poa_e48968_Figure_2_figure_supplement_1.pdf]
